# Supplementary material for: Efficacy and Safety of Pulsed Field Ablation in Atrial Fibrillation: A Systematic Review
Source: MDPI journal article supplement (doi:10.3390/jcm12020719), 2023-01-16
Supplement: s1 [file s1]

## Supplementary Materials

### *Supplementary File S1. Electronic Search Details*

Search builder: (Pulsed field ablation) AND (atrial fibrillation)

PubMed.

Link:

[https://pubmed.ncbi.nlm.nih.gov/?term=\(Pulsed+field+ablation\)+AND+\(atrial+fibrillation\)&sort=relevance](https://pubmed.ncbi.nlm.nih.gov/?term=(Pulsed+field+ablation)+AND+(atrial+fibrillation)&sort=relevance)

Hits: 135

PubMed

Central.

Link:

[https://www.ncbi.nlm.nih.gov/pmc/?term=\(Pulsed+field+ablation\)+AND+\(atrial+fibrillation\)](https://www.ncbi.nlm.nih.gov/pmc/?term=(Pulsed+field+ablation)+AND+(atrial+fibrillation))

Hits: 418

Scopus.

Link:

<https://www.scopus.com/results/results.uri?sort=plf-f&src=s&st1=%28Pulsed+field+ablation%29+AND+%28atrial+fibrillation%29&sid=f21f41e0a6a75e7aaf95573a0207ece3&sot=b&sdt=b&sl=64&s=TITLE-ABS-KEY%28%28Pulsed+field+ablation%29+AND+%28atrial+fibrillation%29%29&origin=searchbasic&editSaveSearch=&yearFrom=Before+1960&yearTo=Present>

Hits: 83

Cochrane Library. Link: <https://www.cochranelibrary.com/advanced-search>

Hits: 8.

Clinical

trial

registry.

Link:

[https://www.clinicaltrials.gov/ct2/results?cond=Atrial+Fibrillation&term=Pulsed+field+ablation&type=&rslt=&age\\_v=&gndr=&intr=&titles=&outc=&spons=&lead=&id=&cntry=&state=&city=&dist=&locn=&rsub=&strd\\_s=&strd\\_e=&prcd\\_s=&prcd\\_e=&sfpd\\_s=&sfpd\\_e=&rfpd\\_s=&rfpd\\_e=&lupd\\_s=&lupd\\_e=&sort=](https://www.clinicaltrials.gov/ct2/results?cond=Atrial+Fibrillation&term=Pulsed+field+ablation&type=&rslt=&age_v=&gndr=&intr=&titles=&outc=&spons=&lead=&id=&cntry=&state=&city=&dist=&locn=&rsub=&strd_s=&strd_e=&prcd_s=&prcd_e=&sfpd_s=&sfpd_e=&rfpd_s=&rfpd_e=&lupd_s=&lupd_e=&sort=)

Hits: 12

Embase.

Link:

<https://www.embase.com/#advancedSearch/resultspage/history.3/page.1/25.items/orderby.date/source>

Hits: 119

**Table S1.** Risk of bias assessment by using ROBINS-I tool.

| SN | Domains                                           | Reddy VY et al [1] | Reddy VY et al [2] | Verma A et al [3] |
|----|---------------------------------------------------|--------------------|--------------------|-------------------|
| 1  | Bias due to confounding                           | Serious            | Serious            | Serious           |
| 2  | Bias in selection of participants into the study  | Low                | Low                | Low               |
| 3  | Bias in classification of interventions           | Low                | Low                | Low               |
| 4  | Bias due to deviation from intended interventions | Low                | Low                | Low               |
| 5  | Bias due to missing data                          | Low                | Low                | Low               |
| 6  | Bias in measurement of outcome                    | Moderate           | Critical           | Serious           |
| 7  | Bias in selection of the reported result          | Serious            | Moderate           | Low               |
|    | Overall risk of bias                              | Serious            | Critical           | Serious           |

**Table S2.** Risk of bias assessment by using JBI checklist.

|    |                                                                                              | Nakatani Y et al [4] | Reddy VY et al [5] | Ekanem E et al [6] |
|----|----------------------------------------------------------------------------------------------|----------------------|--------------------|--------------------|
| 1. | Was the sample frame appropriate to address the target population?                           | No                   | No                 | No                 |
| 2. | Were study participants sampled in an appropriate way?                                       | No                   | No                 | No                 |
| 3. | Was the sample size adequate?                                                                | Not applicable       | Not applicable     | Unclear            |
| 4. | Were the study subjects and the setting described in detail?                                 | Yes                  | Yes                | Yes                |
| 5. | Was the data analysis conducted with sufficient coverage of the identified sample?           | Yes                  | Yes                | Yes                |
| 6. | Were valid methods used for the identification of the condition?                             | Yes                  | Yes                | Yes                |
| 7. | Was the condition measured in a standard, reliable way for all participants?                 | Yes                  | Yes                | Yes                |
| 8. | Was there appropriate statistical analysis?                                                  | Yes                  | Yes                | Yes                |
| 9. | Was the response rate adequate, and if not, was the low response rate managed appropriately? | Yes                  | Yes                | Yes                |

**References:**

- [1] Reddy, V.Y.; Anter, E.; Rackauskas, G.; Peichl, P.; Koruth, J.S.; Petru, J.; Funasako, M.; Minami, K.; Natale, A.; Jais, P.; et al. Lattice-Tip Focal Ablation Catheter That Toggles Between Radiofrequency and Pulsed Field Energy to Treat Atrial Fibrillation: A First-in-Human Trial. *Circ. Arrhythmia Electrophysiol.* **2020**, *13*, 483–495. <https://doi.org/10.1161/CIRCEP.120.008718>.
- [2] Reddy, V.Y.; Koruth, J.; Jais, P.; Petru, J.; Timko, F.; Skalsky, I.; Hebel, R.; Labrousse, L.; Barandon, L.; Kralovec, S.; et al. Ablation of Atrial Fibrillation With Pulsed Electric Fields: An Ultra-Rapid, Tissue-Selective Modality for Cardiac Ablation. *JACC Clin. Electrophysiol.* **2018**, *4*, 987–995. <https://doi.org/10.1016/J.JACEP.2018.04.005>.
- [3] Verma, A.; Boersma, L.; Haines, D.E.; Natale, A.; Marchlinski, F.E.; Sanders, P.; Calkins, H.; Packer, D.L.; Hummel, J.; Onal, B.; et al. First-in-Human Experience and Acute Procedural Outcomes Using a Novel Pulsed Field Ablation System: The PULSED AF Pilot Trial. *Circ. Arrhythmia Electrophysiol.* **2022**, *15*, e010168. <https://doi.org/10.1161/CIRCEP.121.010168>.
- [4] Nakatani, Y.; Sridi-Cheniti, S.; Cheniti, G.; Ramirez, F.D.; Goujeau, C.; André, C.; Nakashima, T.; Eggert, C.; Schneider, C.; Viswanathan, R.; et al. Pulsed field ablation prevents chronic atrial fibrotic changes and restrictive mechanics after catheter ablation for atrial fibrillation. *EP Eur.* **2021**, *23*, 1767–1776. <https://doi.org/10.1093/EUROPACE/EUAB155>.
- [5] Reddy, V.Y.; Anic, A.; Koruth, J.; Petru, J.; Funasako, M.; Minami, K.; Breskovic, T.; Sikiric, I.; Dukkipati, S.R.; Kawamura, I.; et al. Pulsed Field Ablation in Patients With Persistent Atrial Fibrillation. *J. Am. Coll. Cardiol.* **2020**, *76*, 1068–1080. <https://doi.org/10.1016/J.JACC.2020.07.007>.

[6] Ekanem, E.; Reddy, V.Y.; Schmidt, B.; Reichlin, T.; Neven, K.; Metzner, A.; Hansen, J.; Blaauw, Y.; Maury, P.; Arentz, T.; et al. Multi-national survey on the methods, efficacy, and safety on the post-approval clinical use of pulsed field ablation (MANIFEST-PF). *EP Eur.* **2022**, *24*, 1256–1266. <https://doi.org/10.1093/EUROPACE/EUAC050>.
